# Supplementary material for: Individual and Household Risk Factors for Symptomatic Cholera Infection: A Systematic Review and Meta-analysis
Source: PubMed Central journal article supplement (PMC6188541; doi:10.1093/infdis/jiy444), 2018-08-18

| Study or Subgroup     | log[Odds Ratio] | SE     | Cases Controls |            | Weight        | Odds Ratio               |      | Year |
|-----------------------|-----------------|--------|----------------|------------|---------------|--------------------------|------|------|
|                       |                 |        | Total          | Total      |               | IV, Random, 95% CI       | Year |      |
| Shapiro 1999          | 1.2809          | 0.5363 | 61             | 113        | 15.4%         | 3.60 [1.26, 10.30]       | 1999 |      |
| Mugoya 2008           | 3.9318          | 1.2225 | 34             | 68         | 4.3%          | 51.00 [4.64, 559.95]     | 2008 |      |
| CDC 2009              | 0.7885          | 0.5651 | 42             | 81         | 14.4%         | 2.20 [0.73, 6.66]        | 2009 |      |
| Kone-Coulibaly 2010   | 0.8065          | 0.3064 | 140            | 140        | 26.4%         | 2.24 [1.23, 4.08]        | 2010 |      |
| Rosewell 2011         | 0.5878          | 0.511  | 43             | 43         | 16.3%         | 1.80 [0.66, 4.90]        | 2011 |      |
| Nguyen 2014           | 0.1133          | 0.4924 | 49             | 98         | 17.1%         | 1.12 [0.43, 2.94]        | 2014 |      |
| Uthappa 2015          | 1.2528          | 0.9945 | 138            | 138        | 6.1%          | 3.50 [0.50, 24.58]       | 2015 |      |
| <b>Total (95% CI)</b> |                 |        | <b>507</b>     | <b>681</b> | <b>100.0%</b> | <b>2.42 [1.43, 4.09]</b> |      |      |

Heterogeneity: Tau<sup>2</sup> = 0.18; Chi<sup>2</sup> = 9.68, df = 6 (P = 0.14); I<sup>2</sup> = 38%  
 Test for overall effect: Z = 3.30 (P = 0.0010)

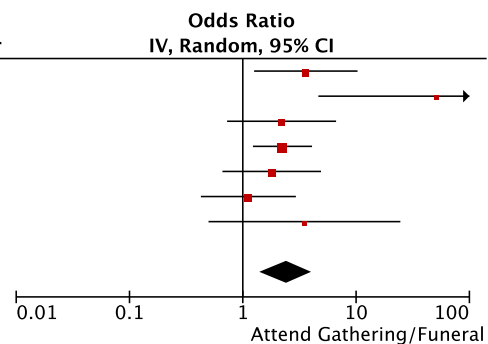

Supplement: jiy444_suppl_supplementary_figure_3.pdf [file jiy444_suppl_supplementary_figure_3.pdf]
