# Supplementary material for: Individual and Household Risk Factors for Symptomatic Cholera Infection: A Systematic Review and Meta-analysis
Source: PubMed Central journal article supplement (PMC6188541; doi:10.1093/infdis/jiy444), 2018-08-18

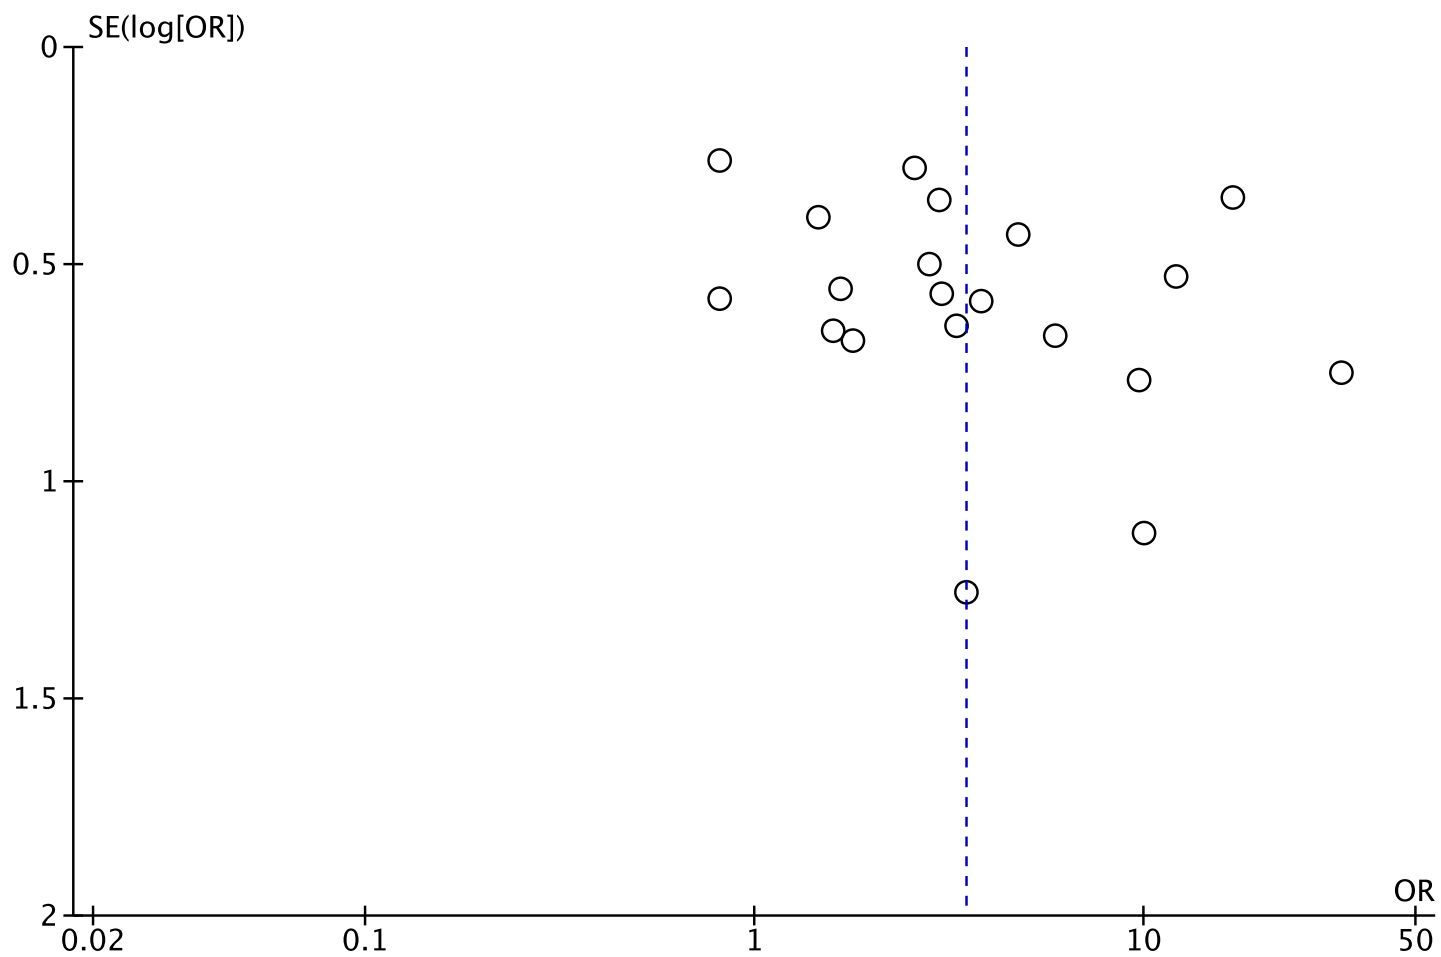

Supplement: jiy444_suppl_supplementary_figure_7.pdf [file jiy444_suppl_supplementary_figure_7.pdf]
